# Supplementary material for: A homozygous missense variant in UBE2T is associated with a mild Fanconi anemia phenotype
Source: PubMed Central journal article supplement — Haematologica. 2021 Apr 1;106(4):1188–92. doi: 10.3324/haematol.2020.259275 (PMC8018101; doi:10.3324/haematol.2020.259275), 2021-04-01
Supplement: 2020_259275-DisclosuresContributions.pdf [file 2020_259275-DisclosuresContributions.pdf]

Haematologica  
HAEMATOL/2020/259275  
Version 3

Homozygous missense variant in UBE2T is associated with mild  
Fanconi anemia phenotype

Laura Schultz-Rogers, Francis P. Lach, Kimberly A. Rickman,  
Alejandro Ferrer, Abhishek A. Mangaonkar, Tanya L. Schwab,  
Christopher T. Schmitz, Karl J. Clark, Nikita R. Dsouza, Michael T.  
Zimmermann, Mark Litzow, Nicole Jacobi, Eric W. Klee, Agata  
Smogorzewska, and Mrinal M. Patnaik

Disclosures: 1. The work was supported in part by the Mayo Clinic Center for Individualized Medicine and the “Henry Predolin Leukemia Foundation”, by the Starr Cancer Consortium grant (to A.S.), NIH RO1 HL120922 (to A.S.), and grant # UL1TR001866 from the National Center for Advancing Translational Sciences, NIH Clinical and Translational Science Award program. K.A.R. was supported by a Medical Scientist Training Program grant from the National Institute of General Medical Sciences of the NIH under award number T32GM007739 to the Weill Cornell/Rockefeller/Sloan-Kettering Tri-Institutional MD-PhD Program. A.S. is HHMI Faculty Scholar.

Contributions: F.P.L., K.A.R., L.S.R., A.F, K.J.C, E.W.K. and A.S. designed the study and interpreted the results. F.P.L, K.A.R, T.L.S., and C.T.S. performed the study. M.M.P, A.M, and M.L. were the treating team at the Mayo Clinic where the patient was seen in the institutional inherited bone marrow failure clinic. N.J. oversaw the patient’s care at Hennepin County Medical Center. N.R.D. and M.T.Z. performed in silico protein modeling. L.S.R., K.A.R., F.P.L, M.M.P., and A.S. wrote manuscript with input from other authors.
