# Supplementary material for: A homozygous missense variant in UBE2T is associated with a mild Fanconi anemia phenotype
Source: PubMed Central journal article supplement — Haematologica. 2021 Apr 1;106(4):1188–92. doi: 10.3324/haematol.2020.259275 (PMC8018101; doi:10.3324/haematol.2020.259275), 2021-04-01
Supplement: 2020_259275_SCHULTZ-ROGERS_SUPPL.pdf [file 2020_259275_SCHULTZ-ROGERS_SUPPL.pdf]

**A homozygous missense variant in *UBE2T* is associated with a mild Fanconi anemia phenotype**

Laura Schultz-Rogers,<sup>1\*</sup> Francis P. Lach,<sup>2\*</sup> Kimberly A. Rickman,<sup>2</sup> Alejandro Ferrer,<sup>1</sup> Abhishek A. Mangaonkar,<sup>3</sup> Tanya L. Schwab,<sup>4</sup> Christopher T. Schmitz,<sup>4</sup> Karl J. Clark,<sup>4</sup> Nikita R. Dsouza,<sup>5</sup> Michael T. Zimmermann,<sup>5,6</sup> Mark Litzow,<sup>3</sup> Nicole Jacobi,<sup>7</sup> Eric W. Klee,<sup>1,8</sup> Agata Smogorzewska<sup>2#</sup> and Mrinal M. Patnaik<sup>3#</sup>

<sup>1</sup>Center for Individualized Medicine, Mayo Clinic, Rochester, MN; <sup>2</sup>Laboratory of Genome Maintenance, The Rockefeller University, New York, NY; <sup>3</sup>Department of Hematology, Mayo Clinic, Rochester, MN; <sup>4</sup>Department of Biochemistry and Molecular Biology, Mayo Clinic, Rochester, MN; <sup>5</sup>Bioinformatics Research and Development Laboratory, Genomics Sciences and Precision Medicine Center, Medical College of Wisconsin, Milwaukee, WI; <sup>6</sup>Clinical and Translational Sciences Institute, Medical College of Wisconsin, Milwaukee, WI; <sup>7</sup>Department of Hematology Oncology, Hennepin County Medical Center, Minneapolis, MN and <sup>8</sup>Department of Clinical Genomics, Mayo Clinic, Rochester, MN, USA

\*LS-R and FPL contributed equally as co-first authors.

#EWK, AS and MMP contributed equally as co-senior authors.

Correspondence: MRINAL PATNAIK - patnaik.mrinal@mayo.edu

AGATA SMOGORZEWSKA - asmogorzewska@rockefeller.edu

doi:10.3324/haematol.2020.259275

## Supplemental Information

### Homozygous missense variant in *UBE2T* is associated with mild Fanconi anemia phenotype

Laura Schultz-Rogers<sup>1\*</sup>, Francis P. Lach<sup>2\*</sup>, Kimberly A. Rickman<sup>2</sup>, Alejandro Ferrer<sup>1</sup>, Abhishek Mangaonkar<sup>3</sup>, Tanya L. Schwab<sup>4</sup>, Christopher T. Schmitz<sup>4</sup>, Karl J. Clark<sup>4</sup>, Nikita R. Dsouza<sup>5</sup>, Michael T. Zimmermann<sup>5,6</sup>, Mark Litzow<sup>3</sup>, Nicole Jacobi<sup>7</sup>, Eric W. Klee<sup>1,8</sup>, Agata Smogorzewska<sup>2†#</sup>, Mrinal M. Patnaik<sup>3†#</sup>.

\* # These authors contributed equally

† Co-corresponding authors

<sup>1</sup>Center for Individualized Medicine, Mayo Clinic, Rochester, MN 55905, USA

<sup>2</sup>Laboratory of Genome Maintenance, The Rockefeller University, New York, NY 10065, USA

<sup>3</sup>Department of Hematology, Mayo Clinic, Rochester, MN 55905, USA

<sup>4</sup>Department of Biochemistry and Molecular Biology, Mayo Clinic, Rochester, MN 55905, USA

<sup>5</sup>Bioinformatics Research and Development Laboratory, Genomics Sciences and Precision Medicine Center, Medical College of Wisconsin, Milwaukee, WI 53226, USA

<sup>6</sup>Clinical and Translational Sciences Institute, Medical College of Wisconsin, Milwaukee, WI 53226, USA

<sup>7</sup>Department of Hematology Oncology, Hennepin County Medical Center, Minneapolis, MN 55404, USA

<sup>8</sup>Department of Clinical Genomics, Mayo Clinic, Rochester, MN 55905, USA

#### Supplemental information includes:

1. Methods
2. Two Supplemental Figures
3. Six Supplemental Tables
4. Supplemental References

## Methods:

**Human subjects:** The Institutional Review Boards of the Mayo Clinic and the Rockefeller University approved these studies. Written consent was obtained from the subject.

**Sequencing:** Sequencing for this patient was performed as previously described (1).

**Molecular modeling:** We used the experimental structure of the human UBE2T:FANCL complex (PDB 4ccg (2, 3)) to assess how the observed patient variant in UBE2T may affect stability or organization of the complex. We used molecular mechanics in Discovery Studio (4) to mutate proline-66 to threonine and obtain the change in the local conformation. Additional measurements of dihedral angles were performed in Chimera(5) and proteins were visualized using PyMOL.

**Antibodies:** HSPC150/UBE2T aa135-197 (Abcam ab154022), FANCD2 (Novus Biologicals NB100-182), alpha-Tubulin (T9026-.5ML), HA.11 Clone 16B12 (Biolegend 901514), Alexa Fluor 594 goat anti-mouse (Invitrogen A11005), Alexa Fluor 488 goat anti-rabbit (Invitrogen A-11008), Peroxidase AP goat anti-rabbit IgG (Jackson 111-035-003), Peroxidase AP goat anti-mouse IgG (Jackson 115-035-003).

**UBE2T cDNAs:** UBE2T cDNA was obtained from the Human ORFeome V8.1 Library (GE Healthcare), cloned into pDONR223 and recombined with a pMSCV retroviral vector (MSCV C-HA-FLAG) using Gateway system (Invitrogen), resulting in a C-terminally HA-FLAG tagged UBE2T (MSCV C-HA-FLAG UBE2T) (6). The UBE2T P66T variant cDNA was obtained by subcloning the full-length cDNA from PM085 and recombining into pDONR223 and then into MSCV C-HA-FLAG. Primers used for cloning and sequencing are shown in Table S6.

**Cell culture and viral transfection/transduction:** Primary fibroblasts from patients PM085, RA2627 (UBE2T/FANCT<sup>-/-</sup>), RA3331 (SLX4/FANCP) (7), RA3226 (BRCA2/FANCD1) (8) from the International Fanconi Anemia Registry), HA239F (RAD50<sup>mut</sup>) (9) and BJ normal fibroblasts (ATCC) were cultured in Dulbecco Modified Eagle medium (DMEM, Invitrogen) supplemented with 15% FBS (Atlanta Biologicals/BioTechne), 100 units of penicillin per milliliter, 0.1 mg of streptomycin per milliliter, non-essential amino acids, and glutamax (Invitrogen). cDNAs were delivered using retroviral transduction after packaging in HEK293T cells (Mirus). Fibroblasts were transduced in the presence of polybrene (4mg/ml) and selected in puromycin.

**Sensitivity Assays:** Transduced primary fibroblasts were seeded overnight and treated next day with mitomycin C (Sigma). Cells were grown for 3 to 4 days, passaged at appropriate ratios, and counted once nearly confluent with a Z2 particle counter (Beckman-Coulter). The percent survival relative to the untreated was then plotted per dose. Experiments were done in triplicate.

**Western Blotting:** Whole cell extracts were prepared by lysing cell pellets in Laemmli sample buffer (Bio-Rad) followed by sonication. Samples were heated to 100°C for five minutes and run on 4%–12% Bis-tris or 3%–8% tris-acetate gradient gels (Invitrogen).

**Immunofluorescence:** Cells were fixed in 3.7% formaldehyde, permeabilized with 0.5% NP-40 in PBS, blocked in 0.5% (v/v) BSA, 0.2% cold water fish gelatin in PBS, and incubated with primary antibodies diluted 1:2000 in blocking buffer. Cells were washed and incubated with Alexa Fluor secondary antibodies diluted 1:2500. Cells were washed and coverslips were embedded with DAPI Fluoromount-G (SouthernBiotech).

```

Homo sapiens -----MQRASRLKRELHMLATEPPPGITCWQDKDQ 30
Pan troglodytes -----MQRASRLKRELHMLATEPPPGITCWQDKDQ 30
Canis lupus -----MQRASRLKRELNLLATEPPPGITCWQDNDQ 30
Bos taurus -----MORTSRLKRELSLLAAEPPPGITCWQDGDR 30
Mus musculus -----MQRASRLKKELHMLAIEPPPGITCWQEKDQ 30
Rattus norvegicus -----MQRASRLKKELHMLAIEPPPGVTCWQEKDK 30
Gallus gallus -----MQRASRLSRELTMLSTEPGGISCWQSGAR 30
Danio rerio -----MQRVSRLKREMQLLTAEPGGVSCWQSEGR 30
Xenopus tropicalis MVLRRRTLITILPRNVCSVGNANLPTVTKMQRVSRLKRELQLLNKEPPPGVTCWQNESN 60
***.***.:*: :* *****:***. .

Homo sapiens MDDLRAQILGGANTPYEKGVFKLEVIIPERYP-----FEPQIRFLTPYHPNIDS 81
Pan troglodytes MDDLRAQILGGANTPYEKGVFKLEVIIPERYP-----FEPQIRFLTPYHPNIDS 81
Canis lupus MDDLRAQILGAADTPYEKGVFKLEVTIIPERYP-----FEPQIRFLTPYHPNIDS 81
Bos taurus MEDLRAQILGGANTPYEKGVFKLEVHIPERYP-----FEPQIRFLTPYHPNIDS 81
Mus musculus VADLRAQILGGANTPYEKGVFTLEVIIPERYP-----FEPQVRFLTPYHPNIDS 81
Rattus norvegicus MDNLRQILGGANTPYEKGIFTLEVIIPERYP-----FEPQIRFLTPYHPNIDS 81
Gallus gallus LDELRAQILGAADTPYEKGIFDLEIVVPELPMKNAVICRYFEPKIRFLTPYHPNIDS 90
Danio rerio LDELQAQIVGGANTPYEGGVFTLEINIPERYP-----FEPKMRFLTPYHPNIDN 81
Xenopus tropicalis MDDLRAQIIGSGSPYEGGIFNLEIIPERYP-----FEPKIRFLTPYHPNIDS 111
: :*:***:*.:.:*** *: * *: : * * *****:*****.

Homo sapiens AGRICLDVCLKPPKGAWRPSLNIATVLTISIQLLMSEPNPDDPLMADISSEFKYNKPAFLK 141
Pan troglodytes AGRICLDVCLKPPKGAWRPSLNIATVLTISIQLLMSEPNPDDPLMADISSEFKYNKPAFLK 141
Canis lupus AGRICLDVCLKPPKGAWRPSLNIATVLTISIQLLMSEPNPDDPLMADISSEFKYNKPVFLK 141
Bos taurus AGRICLDVCLKPPKGAWRPSLNIATLLTCIQQLMAEPNPDDPLMADISSEFKYNKPVFFK 141
Mus musculus SGRICLDILKPPKGAWRPSLNIATVLTISIQLLMAEPNPDDPLMADISSEFKYNKIAFLK 141
Rattus norvegicus SGRICLDILKPPKGAWRPSLNIATVLTISIQLLMAEPNPDDPLMADISSEFKYNKIAFVK 141
Gallus gallus AGRICLDVCLKPPKGAWRPSLNIATVLTISIQLLMVEPNPDDPLMADISSEFKYNKQFLFI 150
Danio rerio AGRICLDALKPPKGAWRPSLNIATVLTISIQLLMAEPNPDDPLMADISSEFKYNKPLYLE 141
Xenopus tropicalis AGRICLDILKPPKGAWRPSLNIATVLTISIQLLMSEPNPDDPLMADISSEFKYNRAVFFS 171
:***** *****:***:*. * * *****:***: :.

Homo sapiens NARQWTEKHARQKQKADEEEMLDNLPEAGDSRVHNSQKRKASQLVGIIEKKFHPDV---- 197
Pan troglodytes NARQWTEKHARQKQKADEEEMLDNLPEAGDSRVHNSQKRKASQLVGIIEKKFHPDV---- 197
Canis lupus NARQWTEKHARQKQEADEEEMPDLLPEAGDSGVCNTAQKRKARPLGSIIEKKFCPDA---- 197
Bos taurus NARQWTEKHARQK--TDEEGMPGSLPEVGGSEGPSAAQKRKAGQLSSGGKRFCDV---- 195
Mus musculus KAKQWTEAHARQKQKADEEEL-GTSSEVGDSEESHSTQKRKARPLGGMQKRFSQDVQVRY 200
Rattus norvegicus KARQWTEHARQKQKAGEEEV-GISSEVGDSEESHSTQKRKARPLGGMQKRFSQDVQVRY 200
Gallus gallus NAKEWTEKYASQKRALEEKTNQNETK---TTKGSVTQKRKGTIGKEEKSRLDP---- 203
Danio rerio KAKKWTAEHAIQKNKGCVEVD-GKTPENKNLKTSHKREALSAQENLEHTKKVCL----- 194
Xenopus tropicalis NARKWTEKHAMPOAQLNKESQE-----TTHKRKSAEIPPEAKKFARET---- 215
:***: * : : : . .. *:

Homo sapiens ---- 197
Pan troglodytes ---- 197
Canis lupus ---- 197
Bos taurus ---- 195
Mus musculus PGPS 204
Rattus norvegicus PGPS 204
Gallus gallus ---- 203
Danio rerio ---- 194
Xenopus tropicalis ---- 215

```

**Supplemental Figure 1. Alignment of UBE2T from multiple species.** The invariant Proline that corresponds to human Proline 66 is highlighted in red.

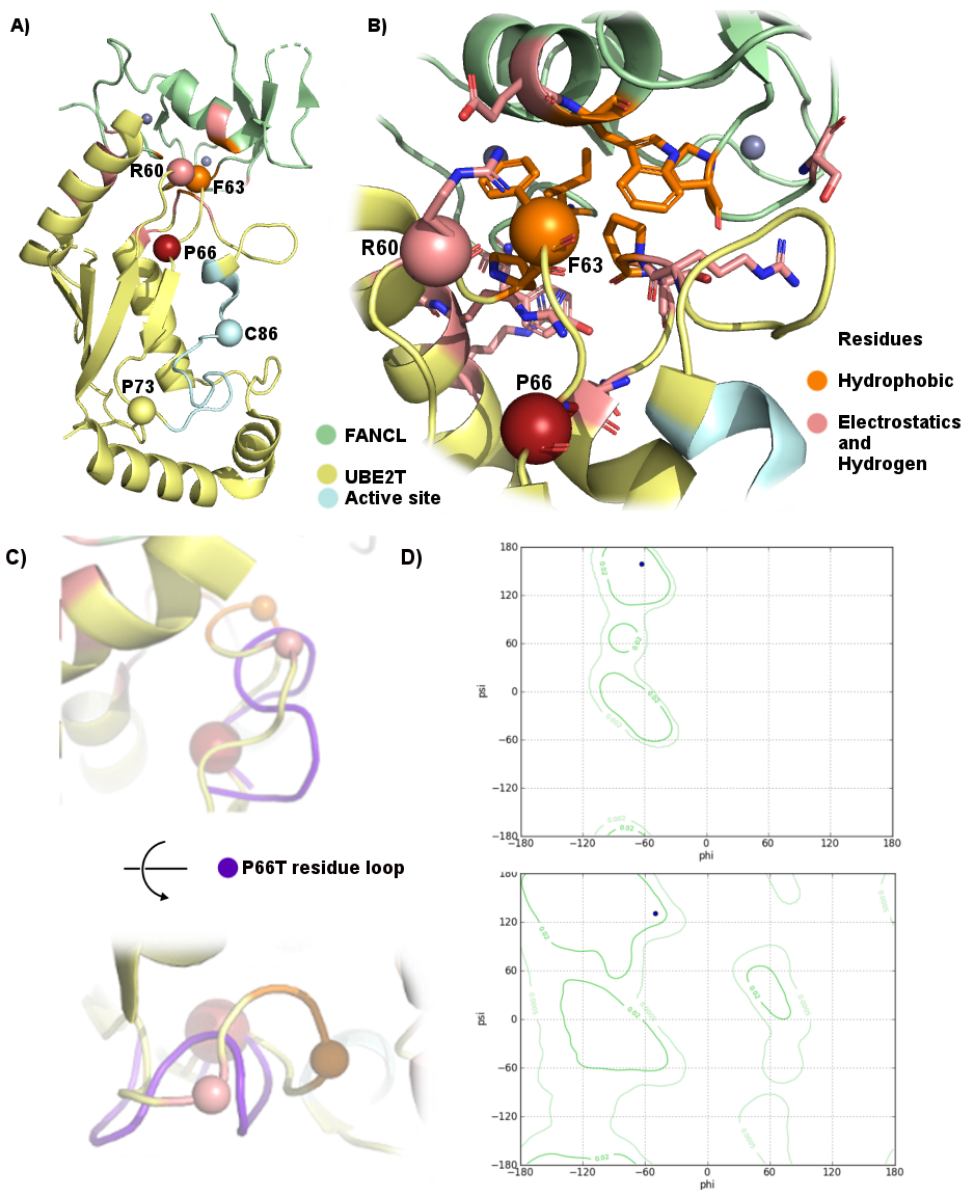

**Supplemental Figure 2. 3D molecular structure of UBE2T WT (PDB 4ccg(2, 3) and modeled P66T variant. A.** The structure of UBE2T:FANCL complex is shown. Represented in spheres are variants that affect FANCL binding or the FANCD2 ubiquitination or both. Highlighted in red is the case variant P66T. **B.** The interaction site of UBE2T and FANCL is displayed with residues interacting with either protein represented in sticks and color indicating the type of interaction. R60E has been previously shown to cause loss of FANCL binding and subsequently a loss of monoubiquitination of FANCD2 (2). F63A has been previously shown to decrease FANCD2 ubiquitination (10). The displacement of the loop when Proline is mutated to Threonine. The loop is shown in the same conformation as previous panels and the loop for P66T shown in purple. The loop has shifted away from the FANCL interface. **D.** Ramachandran plots showing the backbone torsion angle range for (upper) proline compared to (lower) threonine. Threonine has a significantly larger range of motion compared to proline. The blue dot represents the phi/psi angles for P66 and T66, respectively, shown in panel (C).

**Table S1: Patient phenotypes associated with biallelic variants in *UBE2T***

| Phenotype                                     | Rickman <i>et al</i>                                                                       | Hira <i>et al</i> Patient 1                                             | Hira <i>et al</i> Patient 2                                                                                                             | This report                                                                                                          |
|-----------------------------------------------|--------------------------------------------------------------------------------------------|-------------------------------------------------------------------------|-----------------------------------------------------------------------------------------------------------------------------------------|----------------------------------------------------------------------------------------------------------------------|
| <b>UBE2T variant(s)</b>                       | c.-64_468dup<br>c.-64_468del                                                               | c.4C>G<br>(p.Gln2Glu),<br><br>g.202288583-<br>202309772del              | c.4C>G<br>(p.Gln2Glu),<br>c.180+5G>A<br>(p.Gln37Argfs*47)                                                                               | c.196C>A,<br>(p.Pro66Thr)                                                                                            |
| <b>Gender</b>                                 | Male                                                                                       | Female                                                                  | Male                                                                                                                                    | Female                                                                                                               |
| <b>Age at presentation</b>                    | Birth                                                                                      | Birth                                                                   | Birth                                                                                                                                   | 8 years old                                                                                                          |
| <b>Skeletal defects</b>                       | Bilateral radial aplasia, absent thumbs                                                    | Left hypoplastic thumb                                                  | Bilateral thumb polydactyly                                                                                                             | None                                                                                                                 |
| <b>Dysmorphism</b>                            | Micrognathia                                                                               | Not reported                                                            | Abnormal left ear shape                                                                                                                 | None                                                                                                                 |
| <b>Microcephaly</b>                           | Yes                                                                                        | Not reported                                                            | Not reported                                                                                                                            | No                                                                                                                   |
| <b>Skin findings</b>                          | Café au lait spots                                                                         | Not reported                                                            | Not reported                                                                                                                            | Intermittent urticarial rash                                                                                         |
| <b>Cardiovascular</b>                         | Ventricular septal defect and patent ductus arteriosus                                     | Not reported                                                            | Not reported                                                                                                                            | None                                                                                                                 |
| <b>Other</b>                                  | Absent left Kidney                                                                         | Abnormalities of external genitalia                                     | Left facial nerve palsy, dysplasia of the middle ear bone                                                                               | Periodic fevers, menometrorrhagia                                                                                    |
| <b>Endocrine</b>                              | Hypothyroidism                                                                             | Not reported                                                            | Not reported                                                                                                                            | Not reported                                                                                                         |
| <b>Short stature</b>                          | Yes (5th percentile)                                                                       | Yes (-2SD)                                                              | Not reported                                                                                                                            | 142 cm, <10 <sup>th</sup> centile                                                                                    |
| <b>Intellectual Disability</b>                | No                                                                                         | Not reported                                                            | Not reported                                                                                                                            | No                                                                                                                   |
| <b>Hearing loss</b>                           | Yes, bilateral conductive                                                                  | No                                                                      | Yes, deafness                                                                                                                           | No                                                                                                                   |
| <b>Bone age findings</b>                      | Slightly greater than chronological age                                                    | Not reported                                                            | Not reported                                                                                                                            | Not reported                                                                                                         |
| <b>Family History</b>                         | Thalassemia                                                                                | Negative                                                                | Negative                                                                                                                                | Negative                                                                                                             |
| <b>Hematological Findings</b>                 | Thrombocytopenia (resolved shortly after birth); somatic mosaicism, no bone marrow failure | Thrombocytopenia; severe aplastic anemia; bone marrow transplant age 13 | Thrombocytopenia; MDS (refractory anemia) evolving to AML and requiring bone marrow transplant, death 5 months post-transplant at age 8 | Originally presenting with mild leukopenia and thrombocytopenia; persistent macrocytosis and intermittent cytopenias |
| <b>Clinical Chromosomal Breakage analysis</b> | Peripheral blood: 5.8 breaks per cell in 85% of cell population, (DEB)*                    | 0.48 breaks per cell, (DEB)                                             | 0.91 breaks per cell, (DEB)                                                                                                             | Peripheral blood: 1.26 breaks per cell in 58% (MMC) and 0.52 breaks per cell in 36% (DEB) of cells **                |

|                               |                                                                                            |     |                                                                                       |                                                                                                                       |
|-------------------------------|--------------------------------------------------------------------------------------------|-----|---------------------------------------------------------------------------------------|-----------------------------------------------------------------------------------------------------------------------|
| <b>Peripheral blood smear</b> | Moderate neutropenia and microcytic red blood cells consistent with thalassemia trait      | n/a | n/a                                                                                   | Round macrocytes and-or target cells are present                                                                      |
| <b>Bone marrow aspirate</b>   | Mildly hypocellular (35-45%) with trilineage hematopoiesis. No abnormal clones or leukemia | n/a | Cytogenetic analysis of bone marrow revealed complex karyotypes with a 3q abnormality | Moderately hypocellular (40-50%) with no evidence for dysplasia or a lymphoproliferative process. Normal cytogenetics |

\*Reference range for FA positive control for this report was 1.06-23.9 mean chromosome breaks per cell after DEB treatment.

\*\*Reference range for FA positive control in this study was 0.56-12.52 aberrations per cell after MMC, and 0.42-13.24 aberrations per cell after DEB treatment.

**Table S2: Most recent hematological findings for reported patient**

|           |               |
|-----------|---------------|
| Hb        | 12.8 gm/dL    |
| WBC       | 2.9 x10(9)/L  |
| ANC       | 1.4 x 10(9)/L |
| Platelets | 175 x 10(9)/L |
| MCV       | 106.6         |

**Table S3: Periodic fever gene panel**

| <b>Gene</b> |
|-------------|
| MEFV        |
| MUK         |
| LPIN2       |
| TNFRSF1A    |
| NLRP3       |
| MPSTP1P1    |

**Table S4 Custom targeted exome sequencing panel designed in collaboration with GeneDx for inherited bone marrow failure/unexplained cytopenias**

| Gene     | Coverage | Gene    | Coverage | Gene    | Coverage |
|----------|----------|---------|----------|---------|----------|
| ABCG5    | 100%     | DNAJC21 | 100%     | KRAS    | 100%     |
| ABCG8    | 100%     | DNMT3B  | 100%     | LAMTOR2 | 100%     |
| ACD      | 100%     | DOCK8   | 100%     | LIG4    | 100%     |
| ACTN1    | 99.20%   | ELANE   | 100%     | LRBA    | 99.30%   |
| ADA      | 100%     | ERCC4   | 100%     | MAGT1   | 100%     |
| ADAMTS13 | 100%     | ERCC6L2 | 100%     | MECOM   | 100%     |
| ALAS2    | 100%     | ETV6    | 100%     | MPL     | 100%     |
| ANKRD26  | 99.60%   | FADD    | 100%     | MYH9    | 100%     |
| AP3B1    | 100%     | FANCA   | 100%     | NAF1    | 96.10%   |
| ATM      | 100%     | FANCB   | 99%      | NBEAL2  | 99.40%   |
| BLM      | 100%     | FANCC   | 100%     | NBN     | 100%     |
| BLOC1S6  | 100%     | FANCD2  | 100%     | NHEJ1   | 100%     |
| BRCA1    | 100%     | FANCE   | 100%     | NHP2    | 100%     |
| BRCA2    | 100%     | FANCF   | 100%     | NOP10   | 100%     |
| BRIP1    | 100%     | FANCG   | 100%     | NPAT    | 100%     |
| C3       | 100%     | FANCI   | 100%     | NRAS    | 100%     |
| CARD11   | 100%     | FANCL   | 100%     | ORAI1   | 99.40%   |
| CASP10   | 100%     | FANCM   | 98.60%   | PALB2   | 100%     |
| CASP8    | 100%     | FAS     | 100%     | PARN    | 100%     |
| CBL      | 99.80%   | FASLG   | 100%     | PAX5    | 100%     |
| CD27     | 100%     | FLI1    | 100%     | PIK3CD  | 100%     |
| CD3D     | 100%     | FLNA    | 100%     | PNP     | 100%     |
| CD3E     | 100%     | FOXN1   | 100%     | POT1    | 100%     |
| CD40LG   | 100%     | FOXP3   | 100%     | PRF1    | 100%     |
| CD46     | 97%      | FYB     | 97.30%   | PRKACG  | 100%     |
| CFB      | 100%     | G6PC3   | 100%     | PTPRC   | 97.70%   |
| CFH      | 99.80%   | GAR1    | 100%     | RAB27A  | 100%     |
| CFHR1    | 94.10%   | GATA1   | 100%     | RAC2    | 100%     |
| CFHR3    | 100%     | GATA2   | 100%     | RAD50   | 99.60%   |
| CFHR4    | 100%     | GFI1    | 100%     | RAD51C  | 100%     |
| CFHR5    | 99.70%   | GFI1B   | 100%     | RAG1    | 100%     |
| CFI      | 100%     | GP1BA   | 100%     | RAG2    | 100%     |
| CHEK2    | 100%     | GP1BB   | 100%     | RBM8A   | 100%     |
| CSF3R    | 100%     | GP9     | 100%     | RECQL4  | 100%     |
| CTC1     | 100%     | HAX1    | 100%     | RPL11   | 100%     |
| CTLA4    | 100%     | HOXA11  | 100%     | RPL15   | 82.10%   |
| CXCR2    | 100%     | IKZF1   | 10.30%   | RPL26   | 100%     |
| CXCR4    | 100%     | IL2RG   | 100%     | RPL35A  | 100%     |
| CYCS     | 100%     | IL7R    | 100%     | RPL5    | 100%     |
| DCLRE1B  | 100%     | ITGA2B  | 100%     | RPS10   | 100%     |
| DCLRE1C  | 100%     | ITGB3   | 100%     | RPS19   | 100%     |
| DDX41    | 100%     | ITK     | 100%     | RPS24   | 100%     |
| DGKE     | 100%     | JAGN1   | 100%     | RPS26   | 100%     |
| DKC1     | 100%     | JAK3    | 99.30%   | RPS7    | 99.30%   |



| Gene            | Coverage |
|-----------------|----------|
| RTEL1           | 100%     |
| RUNX1           | 100%     |
| SAMD9           | 100%     |
| SAMD9L          | 100%     |
| SBDS            | 100%     |
| SH2D1A          | 100%     |
| SIRT1           | 100%     |
| SIRT4           | 100%     |
| SRP54           | 100%     |
| SRP72           | 100%     |
| STAT3           | 100%     |
| STAT5B          | 100%     |
| STIM1           | 100%     |
| STK4            | 100%     |
| SIRT5           | 100%     |
| SLC37A4         | 81.10%   |
| SLC7A7          | 100%     |
| SLFN14          | 100%     |
| SLX4            | 100%     |
| SRC             | 100%     |
| STN1<br>[OBFC1] | 100%     |
| STX11           | 100%     |
| STXBP2          | 100%     |
| TAZ             | 100%     |
| TBX1            | 91.10%   |
| TCIRG1          | 100%     |
| TERC            | 100%     |
| TERF1           | 100%     |
| TERF2IP         | 100%     |
| TERT            | 100%     |
| THBD            | 100%     |
| TINF2           | 100%     |
| TNFRSF13B       | 100%     |
| TUBB1           | 100%     |
| UBE2T           | 100%     |
| UNC13D          | 100%     |
| USB1            | 100%     |
| VHL             | 100%     |
| VPS13B          | 100%     |
| VPS45           | 100%     |
| VWF             | 98.10%   |
| WAS             | 100%     |
| WIPF1           | 100%     |
| WRAP53          | 100%     |

| Gene  | Coverage |
|-------|----------|
| XIAP  | 100%     |
| XRCC2 | 100%     |
| ZAP70 | 100%     |

**Table S5: *in silico* predictions for pathogenicity of p.Pro66Thr UBE2T variant**

| <i>in silico</i> Tool | Prediction of Variant Effect        |
|-----------------------|-------------------------------------|
| SIFT                  | Deleterious (score: 0)              |
| MutationTaster        | Disease causing (prob: 1)           |
| PolyPhen2             | Probably damaging (score: 1)        |
| MCAP                  | Possibly pathogenic (score: 0.091)  |
| PredictSNP2           | Deleterious (87% expected accuracy) |
| CADD Score            | 31                                  |

**Table S6. Primers used in the study**

| Name                              | Sequence                                                    |
|-----------------------------------|-------------------------------------------------------------|
| FPL474 cDNAF                      | GCGTTGCTGCGTTGTGAGG                                         |
| FPL475 cDNAR                      | TTTCAGGTTTAAAAGATTTCAAATACATA                               |
| FPL476 cDNAseq1F                  | GCATCCCAGGCAGCTCTTAGTGT                                     |
| FPL756 UBE2Tex4F                  | CCCACCCTCCACCCTCAG                                          |
| FPL757 UBE2Tex4R                  | TCAACCATTTACCCACAACACTCACT                                  |
| FPL758 UBE2Tex4F Seq              | AAAAACTGGGGAGAACAACACTGA                                    |
| FPL759 UBE2T att B Fwd<br>no stop | GGGGACAAGTTTGTACAAAAAAGCAGGCTTAATGCAGAGA<br>GCTTCACGTCTGAAG |
| FPL760 UBE2T att B Rvs<br>no stop | GGGGACCACTTTGTACAAGAAAGCTGGGTCAACATCAGG<br>ATGAAATTTCTTTT   |

## Supplemental references

1. Mangaonkar AA, Ferrer A, Pinto EVF, Cousin MA, Kuisle RJ, Gangat N, Hogan WJ, Litzow MR, McAllister TM, Klee EW, Lazaridis KN, Stewart AK, Patnaik MM. Clinical Applications and Utility of a Precision Medicine Approach for Patients With Unexplained Cytopenias. *Mayo Clin Proc.* 2019 Sep;94(9):1753-1768. Epub 2019/07/02. doi:10.1016/j.mayocp.2019.04.007. Cited in: Pubmed; PMID 31256854.
2. Hodson C, Purkiss A, Miles JA, Walden H. Structure of the human FANCL RING-Ube2T complex reveals determinants of cognate E3-E2 selection. *Structure.* 2014 Feb 4;22(2):337-44. Epub 2014/01/07. doi:10.1016/j.str.2013.12.004. Cited in: Pubmed; PMID 24389026.
3. Berman HM, Bhat TN, Bourne PE, Feng Z, Gilliland G, Weissig H, Westbrook J. The Protein Data Bank and the challenge of structural genomics [Research Support, U.S. Gov't, Non-P.H.S. Research Support, U.S. Gov't, P.H.S.]. *Nat Struct Biol.* 2000 Nov;7 Suppl:957-9. eng. Epub 2000/12/05. doi:10.1038/80734. Cited in: Pubmed; PMID 11103999.
4. BIOVIA. Dassault Systèmes BIOVIA, Discovery Studio Modeling Environment, Release 2017, San Diego: Dassault Systèmes. 2017.
5. Pettersen EF, Goddard TD, Huang CC, Couch GS, Greenblatt DM, Meng EC, Ferrin TE. UCSF Chimera--a visualization system for exploratory research and analysis. *J Comput Chem.* 2004 Oct;25(13):1605-12. Epub 2004/07/21. doi:10.1002/jcc.20084. Cited in: Pubmed; PMID 15264254.
6. Rickman KA, Lach FP, Abhyankar A, Donovan FX, Sanborn EM, Kennedy JA, Sougnez C, Gabriel SB, Elemento O, Chandrasekharappa SC, Schindler D, Auerbach AD, Smogorzewska A. Deficiency of UBE2T, the E2 Ubiquitin Ligase Necessary for FANCD2 and FANCI Ubiquitination, Causes FA-T Subtype of Fanconi Anemia. *Cell Rep.* 2015 Jul 7;12(1):35-41. doi:10.1016/j.celrep.2015.06.014. Cited in: Pubmed; PMID 26119737.
7. Kim Y, Lach FP, Desetty R, Hanenberg H, Auerbach AD, Smogorzewska A. Mutations of the SLX4 gene in Fanconi anemia. *Nat Genet.* 2011 Feb;43(2):142-6. Epub 2011/01/18. doi:10.1038/ng.750. Cited in: Pubmed; PMID 21240275.
8. Kim Y, Spitz GS, Veturi U, Lach FP, Auerbach AD, Smogorzewska A. Regulation of multiple DNA repair pathways by the Fanconi anemia protein SLX4. *Blood.* 2013 Jan 3;121(1):54-63. Epub 2012/10/25. doi:10.1182/blood-2012-07-441212. Cited in: Pubmed; PMID 23093618.
9. Waltes R, Kalb R, Gatei M, Kijas AW, Stumm M, Sobbeck A, Wieland B, Varon R, Lerenthal Y, Lavin MF, Schindler D, Dork T. Human RAD50 deficiency in a Nijmegen breakage syndrome-like disorder. *Am J Hum*

Genet. 2009 May;84(5):605-16. Epub 2009/05/05. doi:10.1016/j.ajhg.2009.04.010. Cited in: Pubmed; PMID 19409520.

10. Chaugule VK, Arkinson C, Rennie ML, Kamarainen O, Toth R, Walden H. Allosteric mechanism for site-specific ubiquitination of FANCD2. Nat Chem Biol. 2020 Mar;16(3):291-301. Epub 2019/12/25. doi:10.1038/s41589-019-0426-z. Cited in: Pubmed; PMID 31873223.
